# Supplementary material
Source: MDPI journal article supplement (https://www.mdpi.com/2227-9717/11/2/631)
Supplement: s1 [file s1]

# Supplementary Material: Prediction of Temperature and Viscosity Profiles in Heavy-Oil Producer Wells implementing a Downhole Induction Heater

Javier Ramírez<sup>1,\*</sup>, Alexander Zambrano<sup>2</sup>, Nicolás Ratkovich<sup>1</sup>

<sup>1</sup> Department of Chemical and Food Engineering, Universidad de los Andes,  
Cra. 1 N °18A – 12, Bogotá 111711, Colombia

<sup>2</sup> BCPGroup Artificial Lift, Autopista Medellín Km 0+440 Mts., Tenjo 250208,  
Colombia

\*Correspondence: [ja.ramirezs2@uniandes.edu.co](mailto:ja.ramirezs2@uniandes.edu.co)

## 1 Supplementary Material

Table S1: Dynamic Viscosity and Reynolds Number of Oil function of temperature.

| <b>T</b> [K] | $\mu_0$ [Pa · s] | <b>NRe</b> |
|--------------|------------------|------------|
| 310.93       | 2.1699           | 0.0107     |
| 322.04       | 0.80739          | 0.0288     |
| 333.15       | 0.34908          | 0.0666     |
| 344.26       | 0.16855          | 0.1379     |
| 355.37       | 0.08852          | 0.2626     |
| 366.48       | 0.04962          | 0.4683     |
| 377.59       | 0.02929          | 0.7935     |
| 388.71       | 0.01801          | 1.2906     |
| 399.82       | 0.01143          | 2.0334     |
| 410.93       | 0.00743          | 3.1283     |
| 422.04       | 0.00491          | 4.7347     |
| 433.15       | 0.00327          | 7.1069     |
| 444.26       | 0.00218          | 10.6807    |
| 455.37       | 0.00143          | 16.2804    |
| 466.48       | 0.0009           | 25.6899    |
| 477.59       | 0.00053          | 43.6536    |
